# Supplementary material for: CIC de novo loss of function variants contribute to cerebral folate deficiency by downregulating FOLR1 expression
Source: PubMed Central journal article supplement — J Med Genet. 2020 Aug 20;58(7):484–94. doi: 10.1136/jmedgenet-2020-106987 (PMC7895856; doi:10.1136/jmedgenet-2020-106987), 2020-08-20
Supplement: NIHMS1642008-supplement-Supplementary_data.pdf [file NIHMS1642008-supplement-Supplementary_data.pdf]

Supplementary Figure 1

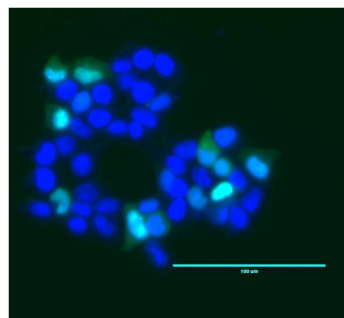

pEGFP-CIC-p.R353X

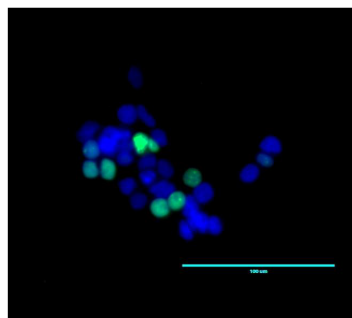

pEGFP-CIC-WT

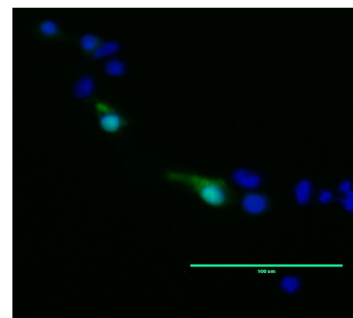

pEGFP-C1

Supplementary Figure 1: Overexpression of wildtype GFPC1-CIC, mutant GFPC1-CIC-R353X and empty vector pEGFP-C1 in Hela cells. The wildtype GFP-CIC 100% localized into nuclear while the mutant GFP-CIC-R353X distributed to both cytoplasm and nucleus similar to the GFP only expressed by pEGFP-C1 plasmids.

Supplimentary Table 1. CIC Sanger sequencing primers

|        |                        |
|--------|------------------------|
| CICF1  | gcaTGCGGCGACGgcctc     |
| CICR1  | GCCAGTACTCTGCACCCCTCA  |
| CICF2  | agaCAAAGGGGTGGGGCTA    |
| CICR2  | agtgAGGGCCATGTCTCTGG   |
| CICF3  | CGgctggacagtgagacaga   |
| CICR3  | aggagcaagCAAGGGGGTAG   |
| CICF4  | TATGGGTTGTTGGGCCAGTc   |
| CICR4  | caagttctgccaccctctg    |
| CICF5  | AGCCTTCCTGGACAGCACTC   |
| CICR5  | cCAGCTGAAGGCCTCAATTC   |
| CICF6  | CATGGCTAGGGGGCTGCTAT   |
| CICR6  | TGCCGACTTCTTGCCGAAT    |
| CICF7  | TCTAagcccttccccacctc   |
| CICR7  | GGGAGCCAAACAGGACTATGG  |
| CICF8  | tcacCCAAGTTctgtgttcc   |
| CICR8  | AGTTAGGGCCCGGactgc     |
| CICF9  | Gtgcagcccctgctctcag    |
| CICR9  | TGagagacacacagggcatgga |
| CICF10 | GCCTTCTCAAGGGGTCTGCT   |
| CICR10 | ggaTGGACCCACCCtacctc   |
| CICF11 | agaatgCAGTGAGGGCTTGG   |
| CICR11 | CCCAAAGTGGAGAGGACGAA   |
